# Supplementary material
Source: Research Square preprint supplement (doi:10.21203/rs.3.rs-9390277/v1)

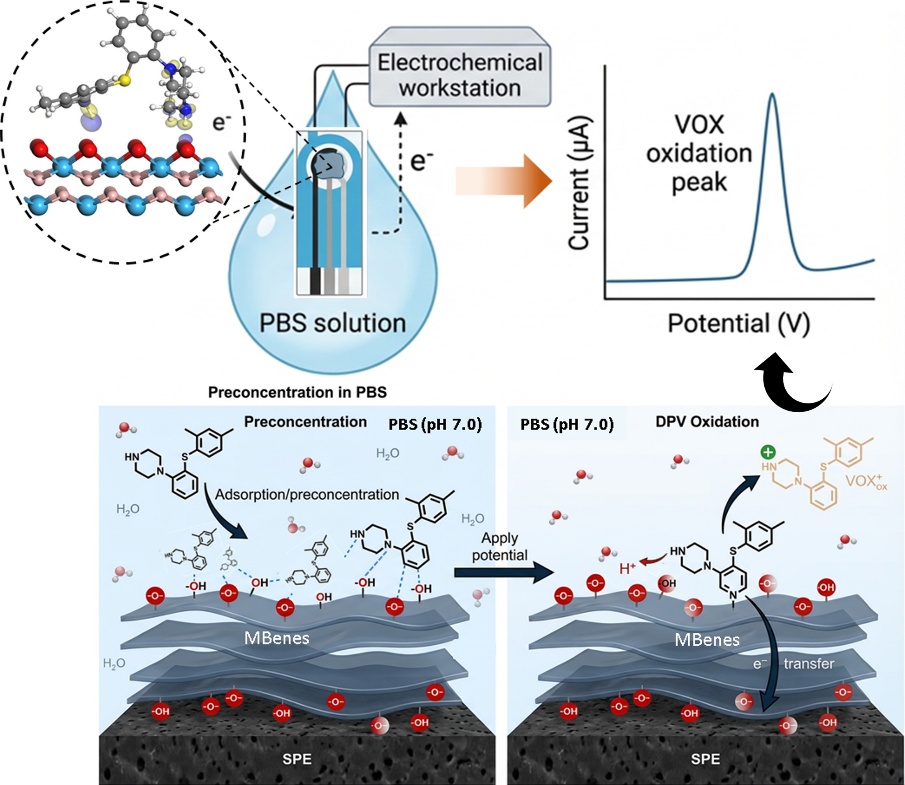

Supplement: Supplementary file 2 [file 09b7b169fd630645783e65bb.docx]
